# Supplementary material
Source: PubMed Central journal article supplement (PMC5096964)
Supplement: NIHMS822955-supplement-01.pdf [file NIHMS822955-supplement-01.pdf]

Supplementary Figure 1.

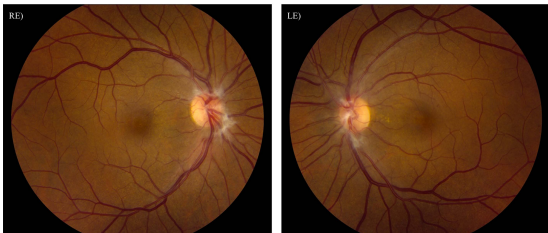

Ophthalmoscopy of patient No. 3 reveals bilateral optic disc fibrosis. This is a very characteristic finding that was present in all seven of our patients with the syndrome of polycythemia, paraganglioma/pheochromocytoma and somatostatinoma; abbreviations: RE=right eye; LE=left eye;
